# Supplementary material for: Contamination status and accumulation characteristics of heavy metals and arsenic in five seabird species from the central Bering Sea
Source: PubMed Central journal article supplement — J Vet Med Sci. 2017 Mar 13;79(4):807–14. doi: 10.1292/jvms.16-0441 (PMC5402206; doi:10.1292/jvms.16-0441), 2017-03-13
Supplement: jvms-79-807-s001.pdf [file jvms-79-807-s001.pdf]

**Table S1.** Sample information

Ad: adult, Ju: juvenile, M: male, F: female, U: unidentified

| species                 | year | longitude | latitude | body weight (g) | sex | age |
|-------------------------|------|-----------|----------|-----------------|-----|-----|
| Northern fulmar         | 2009 | 57'30N    | 180'00   | 580             | F   | Ad  |
| Northern fulmar         | 2009 | 57'30N    | 178'00W  | 713             | U   | Ad  |
| Northern fulmar         | 2009 | 57'30N    | 178'00W  | 601             | M   | Ad  |
| Northern fulmar         | 2009 | 58'30N    | 180'00   | 571             | F   | Ad  |
| Thick-billed murre      | 2008 | 57'30N    | 177'00E  | 1129            | F   | Ju  |
| Thick-billed murre      | 2008 | 58'30N    | 180'00   | 1033            | M   | Ju  |
| Thick-billed murre      | 2009 | 56'30N    | 180'00   | 1052            | U   | Ju  |
| Thick-billed murre      | 2009 | 57'30N    | 179'00W  | 1050            | F   | Ad  |
| Short-tailed shearwater | 2009 | 56'30N    | 177'00E  | 531             | M   | Ju  |
| Short-tailed shearwater | 2009 | 57'30N    | 179'00W  | 454             | M   | Ad  |
| Short-tailed shearwater | 2009 | 57'30N    | 179'00W  | 553             | F   | Ad  |
| Short-tailed shearwater | 2009 | 58'30N    | 180'00   | 419             | M   | Ad  |
| Short-tailed shearwater | 2009 | 58'30N    | 180'00   | 405             | M   | Ad  |
| Short-tailed shearwater | 2009 | 58'30N    | 180'00   | 434             | M   | Ad  |
| Short-tailed shearwater | 2009 | 58'30N    | 180'00   | 513             | F   | Ad  |
| Short-tailed shearwater | 2009 | 56'30N    | 178'00W  | 593             | M   | Ad  |
| Short-tailed shearwater | 2009 | 56'30N    | 178'00W  | 534             | U   | Ad  |
| Short-tailed shearwater | 2009 | 56'30N    | 178'00W  | 588             | F   | U   |
| Short-tailed shearwater | 2009 | 58'30N    | 180'00   | 450             | M   | Ad  |
| Short-tailed shearwater | 2009 | 57'30N    | 180'00   | 535             | F   | Ad  |
| Short-tailed shearwater | 2009 | 57'30N    | 180'00   | 510             | U   | Ad  |
| Short-tailed shearwater | 2009 | 57'30N    | 180'00   | 565             | F   | Ad  |
| Short-tailed shearwater | 2009 | 57'30N    | 178'00W  | 435             | U   | Ju  |
| Short-tailed shearwater | 2009 | 57'30N    | 180'00   | 495             | U   | Ju  |
| Short-tailed shearwater | 2009 | 57'30N    | 180'00   | 535             | F   | Ju  |
| Short-tailed shearwater | 2009 | 57'30N    | 180'00   | 500             | F   | Ad  |
| Short-tailed shearwater | 2009 | 57'30N    | 178'00W  | 450             | M   | Ju  |
| Short-tailed shearwater | 2010 | 55'30N    | 180'00   | 470             | U   | Ju  |
| Short-tailed shearwater | 2010 | 56'30N    | 180'00   | 550             | M   | Ju  |
| Short-tailed shearwater | 2010 | 56'30N    | 180'00   | 495             | U   | Ad  |
| Short-tailed shearwater | 2010 | 55'31N    | 180'00   | 575             | U   | Ju  |
| Short-tailed shearwater | 2010 | 56'30N    | 179'00E  | 655             | U   | U   |
| Tufted puffin           | 2008 | 45'00N    | 180'00   | 836             | M   | Ju  |
| Tufted puffin           | 2009 | 57'30N    | 179'00W  | 763             | F   | Ju  |
| Tufted puffin           | 2010 | 47'30N    | 180'00   | 975             | M   | Ju  |
| Tufted puffin           | 2010 | 44'00N    | 180'00   | 795             | M   | Ad  |
| Tufted puffin           | 2010 | 46'00N    | 180'00   | 835             | M   | U   |
| Horned puffin           | 2008 | 45'00N    | 180'00   | 527             | M   | Ad  |
| Horned puffin           | 2008 | 45'00N    | 180'00   | 653             | F   | Ad  |
| Horned puffin           | 2010 | 46'00N    | 180'00   | 715             | M   | Ad  |

**Table S2.** Pairwise correlation coefficients *r* for body weight, each metal and metalloid in the liver and stable isotope ratio in

|                       |                       | <i>r</i> | <i>P</i> -value |
|-----------------------|-----------------------|----------|-----------------|
| Hg                    | BW                    | 0.01     | 0.93            |
| Cd                    | BW                    | 0.5      | 0               |
| Cd                    | Hg                    | 0.41     | 0.01            |
| Cr                    | BW                    | 0.06     | 0.73            |
| Cr                    | Hg                    | -0.09    | 0.57            |
| Cr                    | Cd                    | -0.16    | 0.33            |
| Ni                    | BW                    | 0.32     | 0.04            |
| Ni                    | Hg                    | -0.19    | 0.23            |
| Ni                    | Cd                    | 0.25     | 0.12            |
| Ni                    | Cr                    | -0.24    | 0.14            |
| Pb                    | BW                    | -0.25    | 0.12            |
| Pb                    | Hg                    | -0.09    | 0.6             |
| Pb                    | Cd                    | -0.14    | 0.38            |
| Pb                    | Cr                    | -0.01    | 0.93            |
| Pb                    | Ni                    | -0.23    | 0.15            |
| Cu                    | BW                    | -0.07    | 0.68            |
| Cu                    | Hg                    | -0.12    | 0.48            |
| Cu                    | Cd                    | 0.04     | 0.82            |
| Cu                    | Cr                    | -0.26    | 0.11            |
| Cu                    | Ni                    | 0.17     | 0.29            |
| Cu                    | Pb                    | -0.18    | 0.26            |
| Zn                    | BW                    | 0.19     | 0.25            |
| Zn                    | Hg                    | 0.14     | 0.4             |
| Zn                    | Cd                    | 0.6      | <.0001          |
| Zn                    | Cr                    | -0.4     | 0.01            |
| Zn                    | Ni                    | 0.41     | 0.01            |
| Zn                    | Pb                    | -0.25    | 0.13            |
| Zn                    | Cu                    | 0.34     | 0.03            |
| Co                    | BW                    | 0        | 0.99            |
| Co                    | Hg                    | -0.23    | 0.16            |
| Co                    | Cd                    | 0.17     | 0.28            |
| Co                    | Cr                    | 0.32     | 0.05            |
| Co                    | Ni                    | 0.03     | 0.88            |
| Co                    | Pb                    | -0.09    | 0.6             |
| Co                    | Cu                    | 0.14     | 0.38            |
| Co                    | Zn                    | 0.41     | 0.01            |
| As                    | BW                    | 0.08     | 0.62            |
| As                    | Hg                    | 0.14     | 0.4             |
| As                    | Cd                    | 0.45     | 0               |
| As                    | Cr                    | -0.44    | 0               |
| As                    | Ni                    | 0.34     | 0.03            |
| As                    | Pb                    | -0.13    | 0.42            |
| As                    | Cu                    | 0.21     | 0.19            |
| As                    | Zn                    | 0.66     | <.0001          |
| As                    | Co                    | 0.15     | 0.37            |
| $\delta^{15}\text{N}$ | BW                    | 0.05     | 0.76            |
| $\delta^{15}\text{N}$ | Hg                    | 0.54     | 0               |
| $\delta^{15}\text{N}$ | Cd                    | 0.21     | 0.22            |
| $\delta^{15}\text{N}$ | Cr                    | -0.31    | 0.07            |
| $\delta^{15}\text{N}$ | Ni                    | -0.03    | 0.86            |
| $\delta^{15}\text{N}$ | Pb                    | -0.09    | 0.61            |
| $\delta^{15}\text{N}$ | Cu                    | 0.12     | 0.48            |
| $\delta^{15}\text{N}$ | Zn                    | 0.31     | 0.07            |
| $\delta^{15}\text{N}$ | Co                    | -0.26    | 0.13            |
| $\delta^{15}\text{N}$ | As                    | 0.26     | 0.14            |
| $\delta^{13}\text{C}$ | BW                    | -0.01    | 0.94            |
| $\delta^{13}\text{C}$ | Hg                    | 0.25     | 0.14            |
| $\delta^{13}\text{C}$ | Cd                    | 0.12     | 0.49            |
| $\delta^{13}\text{C}$ | Cr                    | -0.34    | 0.04            |
| $\delta^{13}\text{C}$ | Ni                    | 0.11     | 0.55            |
| $\delta^{13}\text{C}$ | Pb                    | -0.32    | 0.06            |
| $\delta^{13}\text{C}$ | Cu                    | 0.31     | 0.07            |
| $\delta^{13}\text{C}$ | Zn                    | 0.45     | 0.01            |
| $\delta^{13}\text{C}$ | Co                    | 0.09     | 0.62            |
| $\delta^{13}\text{C}$ | As                    | 0.38     | 0.03            |
| $\delta^{13}\text{C}$ | $\delta^{15}\text{N}$ | 0.71     | <.0001          |
